# Supplementary material for: Patient understanding of discharge instructions in the emergency department: do different patients need different approaches?
Source: PubMed Central journal article supplement (PMC5805670; doi:10.1186/s12245-018-0164-0), 2018-02-08
Supplement: 12245_2018_164_MOESM2_ESM.pdf [file 12245_2018_164_MOESM2_ESM.pdf]

|                  | <b>No understanding</b>                                 | <b>Poor understanding</b>                               | <b>Adequate understanding</b>                   | <b>Excellent understanding</b>                                   |
|------------------|---------------------------------------------------------|---------------------------------------------------------|-------------------------------------------------|------------------------------------------------------------------|
| <b>Diagnosis</b> | Understood diagnosis has no relation to given diagnosis | Significant difference                                  | Understood diagnosis not dangerous or harmful   | Understood diagnosis (nearly) identical to given diagnosis       |
| <b>Follow up</b> | No understanding of follow up plan                      | Significant misunderstanding, could result in poor care | Not complete understanding but no expected harm | Understands all components of follow up plan                     |
| <b>Treatment</b> | No relation                                             | Significant misunderstanding that could result in harm  | Not complete understanding but no expected harm | No gaps in knowledge of treatment including special instructions |
| <b>RTER</b>      | Does not know about RTER instructions                   | Significant misunderstanding that could result in harm  | Not complete understanding but no expected harm | No gaps in knowledge                                             |
